# Supplementary material for: A New Reference Plasmid “pGMT27” Provides an Efficient Transgenic Detection Method for Flue-Cured Tobacco
Source: Hindawi journal article supplement (doi:10.1155/2021/3220013), 2021-11-15
Supplement: f1 [file 3220013.f1.pdf]

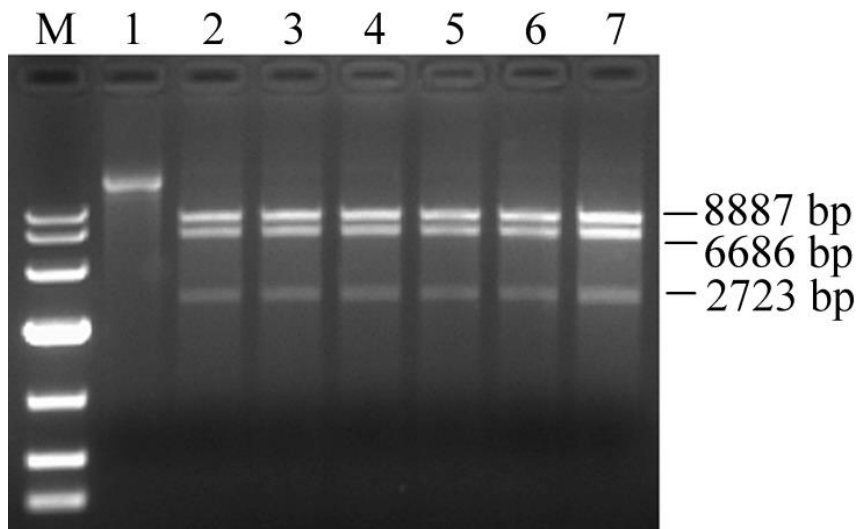

**Figure S1. Sac II and EcoR I restriction digests of pGMT27.** Lane M: TAKARA 10000 Marker; Lane 1: without restriction; Lane2-3: Sac II and EcoR I restriction

**Table S1**

Primers used in qualitative PCR

| Target        | Primer sequence (5'-3')                                  | Amplicon size (bp) |
|---------------|----------------------------------------------------------|--------------------|
| <i>NPT II</i> | GCCCTGAATGAACTGCAGGACGAGGC<br>GCAGGCATCGCCATGGGTCACGACGA | 411                |
| <i>T-NOS</i>  | CCGGTCTTGCGATGATTATCAT<br>AGTAACATAGATGACACCGCGC         | 199                |
| <i>P-35S</i>  | CTACCCGAGCAATAATCTCCAGG<br>TGCTCCACCATGTTGACGAAG         | 345                |
| <i>GUS</i>    | TGGGCATTCAGTCTGGATCG<br>AGTCCCGCTAGTGCCTTGTC             | 645                |
| <i>HPT</i>    | TGGCGACCTCGTATTGGGAA<br>AGCTGCGCCGATGGTTTCTA             | 538                |
| <i>Bar</i>    | TCTGCACCATCGTCAACCA<br>ACCCACGTCATGCCAGTTC               | 425                |
| <i>aadA</i>   | ACATTGATCTGGCTATCTTGCTGACA<br>CGTAGTGGACAAATTCTTCCAAGTGA | 375                |
| <i>Actin</i>  | GAAAATCTTAACAGAGCGAGGCTAC<br>GTTGGAAAAGGACTTCAGGGCA      | 221                |
| <i>NR</i>     | CGCTGATAACTGGATTGAACGC<br>GGTTACGAACGTAATGAAGTGGGAC      | 137                |

**Table S2**Primer and probe sequence of the *P-35S* and *NR* in qPCR

| PCR target   | Primer/probe | Sequence (5'-3')                      |
|--------------|--------------|---------------------------------------|
| <i>P-35S</i> | 35S-GE1-F    | AACCTCCTCGGATTCCATTGC                 |
|              | 35S-GE1-R    | TGGGTGGGGGTCCATCTTTG                  |
|              | 35S-GE1-TMP  | FAM-CCACTGTCGGCAGAGGCATCTTCAACG-TAMRA |
| <i>NR</i>    | NR-GE2-F     | TCATAATAGCTTACATGCAGAACGG             |
|              | NR-GE2-R     | TTCTTGGGTGGTGACTATAATCCTC             |
|              | NR-GE2-TMP   | FAM-CGACCACGGGTTTCCAGTACGAATGAT-TAMRA |
